# Supplementary material
Source: MDPI journal article supplement (https://www.mdpi.com/2073-4441/15/18/3290)
Supplement: s1 [file s1]

**Table S1:** Input data for BEP models.

|          | TURBINE_  |             | TURBINE_ | TURBINE_ | TURBINE_    | TURBINE_ | PUMP_ROT_ |             | PUMP_       | PUMP_      | PUMP_       | PUMP_ |
|----------|-----------|-------------|----------|----------|-------------|----------|-----------|-------------|-------------|------------|-------------|-------|
| DIAMETER | ROT_SPEED | TURBINE_NS  | FLOW     | HEAD     | POWER       | EFF      | SPEED     | PUMP_NS     | FLOW        | HEAD       | POWER       | EFF   |
| 225      | 1500      | 18.49822804 | 19.93    | 25.8     | 3678.543876 | 0.73     | 1500      | 20.97863057 | 10.8        | 14.5       | 1181.7036   | 0.77  |
| 258      | 1500      | 18.6185266  | 50.23    | 47.37    | 17954.91542 | 0.77     | 1500      | 24.4559958  | 26.5        | 21.5       | 4355.169    | 0.78  |
| 206      | 1500      | 28.1190401  | 33       | 20.66    | 5411.96964  | 0.81     | 1500      | 35.32650233 | 25.4        | 12.8       | 2501.14816  | 0.785 |
| 174      | 1450      | 30.07042129 | 23.55    | 14.42    | 2396.154096 | 0.72     | 1450      | 36.37931412 | 15.27       | 8.38       | 933.0009091 | 0.744 |
| 264      | 1450      | 35.71564943 | 88.93    | 27.8     | 20351.59493 | 0.84     | 1450      | 39.6562658  | 65.9        | 19.8       | 10869.1506  | 0.85  |
| 200      | 1450      | 41.12524641 | 45.43    | 14.72    | 5242.840064 | 0.8      | 1450      | 45.15782309 | 33          | 10.5       | 2716.56     | 0.8   |
| 139      | 1450      | 38.11128025 | 17.85    | 8.74     | 1161.955032 | 0.76     | 1450      | 46.28005498 | 13.5        | 5.6        | 563.0688    | 0.76  |
| 165      | 1450      | 57.62654762 | 44.94    | 9.32     | 3037.433482 | 0.74     | 1450      | 61.26069833 | 28.9        | 6.4        | 1305.07776  | 0.72  |
| 224      | 1450      | 69.95482638 | 130.38   | 14.64    | 14216.46831 | 0.76     | 1450      | 79.21496153 | 103         | 10.6       | 8987.6976   | 0.84  |
| 250      | 1450      | 10.91050612 | 12.48    | 36.49    | 2856.238694 | 0.64     | 1450      | 14.96573304 | 8           | 17.8       | 914.0656    | 0.655 |
| 250      | 1450      | 17.76948598 | 37.68    | 39.78    | 10723.205   | 0.73     | 1450      | 23.89346878 | 25.01886792 | 20.4       | 3801.346777 | 0.76  |
| 250      | 1450      | 31.87460662 | 84.66    | 31.31    | 19222.90976 | 0.74     | 1450      | 39.52287722 | 57.2027027  | 18.0982659 | 8775.981447 | 0.865 |
| 250      | 1450      | 47.73112559 | 123.05   | 23.45    | 22056.93399 | 0.78     | 1450      | 55.43465571 | 107         | 17.5       | 15964.935   | 0.87  |
| 260      | 1450      | 5.298049924 | 8.32     | 72.96    | 1903.637299 | 0.32     | 1450      | 18.69319501 | 15.88       | 20.9       | 1548.209802 | 0.476 |
| 209      | 1450      | 8.044784269 | 6.03     | 33.73    | 1016.552716 | 0.51     | 1450      | 24.82686774 | 13.9        | 13.1       | 997.525438  | 0.559 |
| 209      | 1450      | 10.68994549 | 10.21    | 32.8     | 1837.865344 | 0.56     | 1450      | 15.76491285 | 6.027       | 13.75      | 528.7020007 | 0.651 |
| 176      | 1450      | 11.03129436 | 5.55     | 20.95    | 695.077005  | 0.61     | 1450      | 38.24743163 | 16.01       | 8.09       | 817.4323041 | 0.644 |
| 260      | 1450      | 12.09737493 | 16.26    | 37.93    | 3868.20457  | 0.64     | 1450      | 16.14164921 | 11.41       | 20.39      | 1543.539027 | 0.677 |
| 142      | 1450      | 36.72997368 | 16.07    | 8.56     | 1051.502525 | 0.78     | 1450      | 42.42560045 | 12.02       | 5.82       | 544.3447397 | 0.794 |
| 330      | 1450      | 5.524976958 | 13.08    | 93.28    | 5141.511514 | 0.43     | 1450      | 9.051198266 | 7.39        | 33.01      | 1051.886097 | 0.44  |
| 326      | 1450      | 5.043438029 | 14.11    | 110.8    | 5362.42084  | 0.35     | 1450      | 9.477111064 | 7.52        | 31.41      | 1041.656112 | 0.45  |
| 260      | 1450      | 8.810083155 | 10.65    | 43.66    | 2323.965042 | 0.51     | 1450      | 12.80005673 | 6.97        | 20         | 751.366     | 0.55  |
| 209      | 1450      | 12.59783742 | 9.72     | 25.5     | 1433.12652  | 0.59     | 1450      | 16.34176756 | 5.28        | 12         | 341.5104    | 0.55  |
| 174      | 1450      | 26.03012224 | 15.28    | 13.1     | 1432.001872 | 0.73     | 1450      | 28.71685931 | 9.72        | 8.5        | 542.48292   | 0.67  |
| 219      | 1450      | 26.91208668 | 36.52    | 22.4     | 6253.158912 | 0.78     | 1450      | 30.29992161 | 24.16       | 14.52      | 2544.024806 | 0.74  |
| 198      | 1450      | 29.8160392  | 31.22    | 17.6     | 4092.467456 | 0.76     | 1450      | 34.11991147 | 23.19       | 12.06      | 1973.361398 | 0.72  |

Table S1. *Cont.*

|          | TURBINE_  |             | TURBINE_ | TURBINE_ | TURBINE_    | TURBINE_ | PUMP_ROT_ |             | PUMP_ | PUMP_ | PUMP_       | PUMP_ |
|----------|-----------|-------------|----------|----------|-------------|----------|-----------|-------------|-------|-------|-------------|-------|
| DIAMETER | ROT_SPEED | TURBINE_NS  | FLOW     | HEAD     | POWER       | EFF      | SPEED     | PUMP_NS     | FLOW  | HEAD  | POWER       | EFF   |
| 219      | 1450      | 35.91158862 | 50       | 18.8     | 7738.08     | 0.84     | 1450      | 43.48479928 | 41.67 | 12.9  | 4003.620264 | 0.76  |
| 224      | 1450      | 60.46030333 | 84.33    | 13.3     | 9232.920648 | 0.84     | 1450      | 64.04066177 | 57.93 | 9.59  | 4464.389353 | 0.82  |
| 185      | 1450      | 64.51990202 | 43.63    | 7.86     | 2352.512148 | 0.7      | 1450      | 77.38519264 | 34.95 | 5.32  | 1421.279496 | 0.78  |
| 260      | 1450      | 15.28213215 | 26.02    | 38       | 6298.4012   | 0.65     | 1450      | 20.22748988 | 16.5  | 19.3  | 2028.5265   | 0.65  |
| 269      | 1450      | 21.04065088 | 40.28    | 33.2     | 9567.015584 | 0.73     | 1450      | 25.4683104  | 26.77 | 19.6  | 3753.646568 | 0.73  |
| 174      | 1200      | 30.42711379 | 17.33    | 8.99     | 1189.383167 | 0.779    | 2950      | 36.16314437 | 31.29 | 35.13 | 7971.52676  | 0.74  |
| 350      | 1500      | 30.5542794  | 124.5    | 44.82    | 46099.35553 | 0.843    | 1450      | 31.95778982 | 90    | 32.5  | 24078.6     | 0.84  |
| 177      | 2000      | 47.05537823 | 47.3     | 19.4     | 6564.65348  | 0.73     | 2000      | 55.98343114 | 33.8  | 12.3  | 3088.283016 | 0.758 |
| 325      | 3000      | 11.64036442 | 49.53    | 221.2    | 73869.97713 | 0.688    | 3000      | 15.3197781  | 30.62 | 111.3 | 22978.13965 | 0.688 |
| 180      | 2000      | 16.01124109 | 10.51    | 29.96    | 2178.588976 | 0.706    | 2000      | 19.61386593 | 6.37  | 16.37 | 667.3095939 | 0.653 |
| 215      | 2900      | 41.83009393 | 114      | 66.96    | 62389.63181 | 0.834    | 2900      | 46.6362481  | 80.5  | 45.93 | 30038.13273 | 0.829 |
| 262      | 1475      | 27.06055905 | 51.48    | 28.6     | 11846.05662 | 0.821    | 1475      | 30.44277464 | 43.06 | 21.7  | 7325.71168  | 0.8   |
| 219      | 1050      | 36.83770689 | 40.51    | 10.27    | 3343.278957 | 0.82     | 1475      | 43.45889771 | 43.06 | 13.5  | 4699.89135  | 0.825 |
| 185      | 1250      | 47.75475533 | 55       | 11.24    | 4507.41984  | 0.744    | 1474      | 64.59137593 | 41.67 | 7.78  | 2541.669984 | 0.8   |
| 224      | 1450      | 62.63298606 | 138      | 17.62    | 18062.6003  | 0.758    | 1450      | 80.01214358 | 103.6 | 10.5  | 8954.7696   | 0.84  |
| 200      | 3000      | 6.201147608 | 10.07    | 177.1    | 7602.621411 | 0.435    | 3000      | 9.562706359 | 5.51  | 66.5  | 1702.070958 | 0.474 |
| 160      | 3000      | 15.63026849 | 14.14    | 64.74    | 6208.036686 | 0.692    | 3000      | 18.89929581 | 10.71 | 41.76 | 2932.257828 | 0.669 |
| 125      | 3000      | 40.11402743 | 29.1     | 29.81    | 6681.955619 | 0.786    | 3000      | 42.18947566 | 19.62 | 21.43 | 3065.633162 | 0.744 |
| 356      | 1800      | 22.6002503  | 109.1    | 78.24    | 64328.88262 | 0.769    | 1800      | 23.4129288  | 84.4  | 62.9  | 40476.10974 | 0.778 |
| 505      | 837       | 21.6896477  | 112      | 30.3     | 26905.13952 | 0.809    | 1160      | 20.55374725 | 112   | 50.3  | 46375.7952  | 0.84  |
| 312      | 578.2     | 32.62965139 | 50       | 6.27     | 2620.6719   | 0.853    | 700       | 39.27505975 | 52.53 | 6.53  | 2827.109654 | 0.841 |
| 340      | 2500      | 33.82638425 | 267.3    | 128.7    | 305106.9922 | 0.905    | 2500      | 33.31451053 | 183.2 | 102.1 | 163692.4866 | 0.893 |
| 340      | 2500      | 36.58859635 | 268.3    | 116.2    | 273754.26   | 0.896    | 2500      | 35.46187005 | 195.5 | 98.1  | 169906.6102 | 0.904 |
| 315      | 1510      | 24.47288695 | 83.21    | 46.47    | 27928.12361 | 0.737    | 1500      | 26.31147055 | 60.06 | 33.65 | 15963.62488 | 0.806 |
| 350      | 2940      | 36.06137109 | 369.4    | 182      | 583092.7284 | 0.885    | 2940      | 42.23794785 | 297.5 | 127.6 | 337048.1268 | 0.906 |
| 409      | 1607      | 99.01140429 | 424.2    | 23.2     | 76578.21293 | 0.794    | 1640      | 102.6561318 | 349.4 | 19.96 | 59118.80145 | 0.865 |
| 409      | 1507      | 163.7006655 | 413      | 10.7     | 33909.52194 | 0.783    | 1640      | 184.1900219 | 327.6 | 8.77  | 24608.26499 | 0.874 |

Table S1. *Cont.*

|          | TURBINE_  |             | TURBINE_ | TURBINE_ | TURBINE_    | TURBINE_ | PUMP_ROT_ |             | PUMP_  | PUMP_   | PUMP_       | PUMP_ |
|----------|-----------|-------------|----------|----------|-------------|----------|-----------|-------------|--------|---------|-------------|-------|
| DIAMETER | ROT_SPEED | TURBINE_NS  | FLOW     | HEAD     | POWER       | EFF      | SPEED     | PUMP_NS     | FLOW   | HEAD    | POWER       | EFF   |
| 284      | 1750      | 21.39966166 | 50.46    | 48.47    | 17545.16362 | 0.732    | 1750      | 23.71942323 | 36.1   | 33.8    | 9781.450952 | 0.818 |
| 273      | 857       | 37.09277983 | 51.85    | 9.15     | 3431.249451 | 0.738    | 1199      | 52.02022475 | 52.1   | 9.15    | 3536.557899 | 0.757 |
| 200      | 2000      | 19.14139504 | 32.95    | 50.58    | 10354.98747 | 0.634    | 2000      | 26.43405177 | 19.42  | 23.12   | 3172.476368 | 0.721 |
| 250      | 1000      | 10.82588889 | 11.88    | 21.74    | 1655.311775 | 0.654    | 1450      | 14.35449179 | 8.7    | 19.9    | 1096.051404 | 0.646 |
| 101.4    | 2500      | 10.5494399  | 2.801    | 29.14    | 428.7395242 | 0.536    | 2500      | 19.33874957 | 1.382  | 8.11    | 57.5554243  | 0.524 |
| 246      | 1450      | 21.14115811 | 25.37    | 24.24    | 3459.322494 | 0.574    | 1425      | 25.92324244 | 20     | 15.4    | 2209.4688   | 0.732 |
| 320      | 920       | 8.349373661 | 12.19    | 27.98    | 1734.781768 | 0.519    | 1450      | 11.97958149 | 12.53  | 32.3    | 2439.241413 | 0.615 |
| 334      | 1500      | 21.3317348  | 69.39    | 49.01    | 26828.94197 | 0.805    | 1450      | 22.99112406 | 51.39  | 34.7    | 14155.30355 | 0.81  |
| 219      | 1500      | 34.85977522 | 56.15    | 22.11    | 9477.679896 | 0.779    | 1450      | 43.01172987 | 42.92  | 13.35   | 4801.016178 | 0.855 |
| 210      | 1173      | 138.4196652 | 90.4     | 3.48     | 2420.156256 | 0.785    | 1760      | 145.1692848 | 90.4   | 5.61    | 4125.109296 | 0.83  |
| 203      | 609.2     | 219.9560004 | 51.73    | 0.54     | 208.0539216 | 0.76     | 970       | 262.5355278 | 51.73  | 0.793   | 302.3149205 | 0.752 |
| 318      | 1510      | 20.50977013 | 48.15    | 40.84    | 14954.42854 | 0.776    | 1480      | 22.54145329 | 38.48  | 30.19   | 9517.667519 | 0.836 |
| 216      | 1525      | 35.12866653 | 64.9     | 24.64    | 11690.96347 | 0.746    | 1485      | 47.83412079 | 40.94  | 11.59   | 4059.491101 | 0.873 |
| 280      | 1550      | 38.21343111 | 120.5    | 34       | 31277.3174  | 0.779    | 1450      | 44.80335383 | 86.1   | 20.11   | 13150.52224 | 0.775 |
| 134      | 3100      | 9.29572205  | 3.754    | 55.86    | 965.8710146 | 0.47     | 2900      | 13.82912473 | 2.226  | 21.24   | 197.385546  | 0.426 |
| 184      | 3000      | 25.63008769 | 18.68    | 40.31    | 3800.344568 | 0.515    | 2850      | 24.68527143 | 9.86   | 25.85   | 1421.267432 | 0.569 |
| 140      | 3000      | 53.42499892 | 44.79    | 27.12    | 7999.559931 | 0.672    | 2850      | 66.58975041 | 25     | 12.8    | 2148.16     | 0.685 |
| 127      | 3550      | 17.37867767 | 11.53    | 61.4     | 4509.59054  | 0.65     | 3500      | 20.21936174 | 6.94   | 35.1    | 1527.821568 | 0.64  |
| 190      | 2900      | 29.70883514 | 50       | 61       | 19817.07    | 0.663    | 2900      | 37.62629629 | 41     | 39      | 12332.4474  | 0.787 |
| 200      | 2900      | 17.94533389 | 21       | 67       | 10217.3526  | 0.741    | 2900      | 21.61874948 | 17     | 45.4    | 5619.78452  | 0.743 |
| 120      | 1450      | 68.47167766 | 22       | 4.6      | 482.98712   | 0.487    | 1450      | 63.9904518  | 15     | 3.9     | 311.3019    | 0.543 |
| 255      | 1500      | 15.33435959 | 25.62    | 39.17    | 6195.82756  | 0.63     | 1500      | 20.59476902 | 14.48  | 18.07   | 1569.293631 | 0.612 |
| 235      | 1500      | 17.08652911 | 23.93    | 32.4     | 4558.95216  | 0.6      | 1500      | 21.31035859 | 14.36  | 17.17   | 1524.685149 | 0.631 |
| 215      | 1500      | 15.95748015 | 26.01    | 37.52    | 5642.626046 | 0.59     | 1500      | 24.70445773 | 13.83  | 13.75   | 1110.70113  | 0.596 |
| 401      | 1520      | 15.67010126 | 72.615   | 77.57348 | 41899.36758 | 0.759    | 1450      | 17.86672249 | 52.673 | 49.373  | 19140.07273 | 0.751 |
| 220      | 1570      | 14.28051156 | 30.197   | 51.0721  | 10398.29247 | 0.688    | 2900      | 15.35959461 | 42.037 | 130.952 | 41647.33598 | 0.772 |
| 384      | 1550      | 63.47328671 | 144.7    | 19.5269  | 18724.19155 | 0.6762   | 2935      | 22.2260338  | 19.644 | 48.957  | 7775.435925 | 0.825 |

Table S1. *Cont.*

|          | TURBINE_  |             | TURBINE_ | TURBINE_ | TURBINE_    | TURBINE_ | PUMP_ROT_ |             | PUMP_  | PUMP_  | PUMP_       | PUMP_ |
|----------|-----------|-------------|----------|----------|-------------|----------|-----------|-------------|--------|--------|-------------|-------|
| DIAMETER | ROT_SPEED | TURBINE_NS  | FLOW     | HEAD     | POWER       | EFF      | SPEED     | PUMP_NS     | FLOW   | HEAD   | POWER       | EFF   |
| 139      | 1200      | 13.30000937 | 5.1      | 11.99    | 323.600508  | 0.54     | 1450      | 27.04328659 | 3.889  | 5      | 129.390919  | 0.679 |
| 419      | 1000      | 24.27695832 | 90.57    | 28.69    | 22918.35811 | 0.9      | 1000      | 24.86984592 | 77.778 | 25.1   | 15114.14763 | 0.79  |
| 226      | 754       | 71.90701792 | 133      | 5.98     | 6157.52228  | 0.79     | 1450      | 104.3379796 | 222    | 12.25  | 20921.1135  | 0.785 |
| 189      | 2900      | 28.73134731 | 60.33    | 72.29    | 35474.45386 | 0.83     | 2900      | 37.67673678 | 41.11  | 39     | 12365.53445 | 0.787 |
| 146      | 2900      | 77.15669662 | 30.09    | 12.18    | 3088.829974 | 0.86     | 2900      | 26.61334291 | 24.58  | 44     | 8108.15544  | 0.765 |
| 258      | 1450      | 15.57726661 | 19.44    | 30.5     | 4067.4312   | 0.7      | 1450      | 16.07846271 | 11.58  | 20.7   | 1674.921704 | 0.713 |
| 203      | 1480      | 23.50362504 | 22.22    | 19.8     | 3276.792288 | 0.76     | 1480      | 27.0527407  | 13.889 | 12     | 1260.943421 | 0.772 |
| 140      | 2900      | 30.90080693 | 25.14    | 36.6     | 6853.083552 | 0.76     | 2900      | 35.49319552 | 18.5   | 24.8   | 3552.0296   | 0.79  |
| 158      | 3000      | 20.96082891 | 18       | 51.42    | 6530.75136  | 0.72     | 3000      | 18.26196849 | 11     | 44.5   | 3233.2454   | 0.674 |
| 127      | 3000      | 31.12885295 | 18.1     | 30.46    | 3728.066412 | 0.69     | 3000      | 26.43724035 | 10     | 25.5   | 1691.823    | 0.677 |
| 127      | 3000      | 52.75802238 | 39.1     | 25.19    | 6660.089898 | 0.69     | 3000      | 47.94064692 | 26.1   | 21.86  | 4042.546628 | 0.723 |
| 155      | 1450      | 11.42703395 | 4.99     | 18.62    | 364.222096  | 0.4      | 1450      | 36.19002718 | 8.95   | 5.91   | 233.264745  | 0.45  |
| 200      | 1750      | 19.51855446 | 28.67    | 37.59    | 6759.367642 | 0.64     | 1750      | 28.54415884 | 19.31  | 17.4   | 2453.092194 | 0.745 |
| 132      | 1500      | 16.51118216 | 6.01     | 13.5     | 381.65904   | 0.48     | 1450      | 24.0415586  | 3.84   | 5.8    | 152.78592   | 0.7   |
| 301      | 1520      | 32.69966465 | 95.83    | 35       | 26624.4489  | 0.81     | 1450      | 33.61897157 | 75     | 26.9   | 16608.06    | 0.84  |
| 389      | 1020      | 43.78474483 | 302.78   | 30       | 75664.722   | 0.85     | 1450      | 50.20146011 | 291.94 | 39     | 98189.93184 | 0.88  |
| 255      | 1500      | 16.48201216 | 25       | 35       | 5659.5      | 0.66     | 1500      | 20.61925683 | 15.06  | 18.52  | 1639.997856 | 0.6   |
| 242      | 2900      | 8.581423171 | 11.11    | 117.2    | 8804.746104 | 0.69     | 2900      | 9.687126335 | 10.77  | 97.667 | 7318.936439 | 0.71  |
| 236      | 1450      | 77.46962362 | 126      | 12.49    | 12800.80116 | 0.83     | 1450      | 93.76903205 | 100    | 8.3    | 6678.014    | 0.821 |
| 259      | 1450      | 25.70608658 | 50       | 29.36    | 10789.8     | 0.75     | 1450      | 47.91213537 | 50     | 12.8   | 4327.68     | 0.69  |
| 200      | 1500      | 21.80783584 | 20.08    | 20.82    | 2622.107443 | 0.64     | 1500      | 27.02091127 | 15     | 12.88  | 925.85304   | 0.489 |
| 301      | 1450      | 31.19375904 | 95.83    | 35       | 26624.4489  | 0.81     | 1450      | 33.52554224 | 75     | 27     | 16669.8     | 0.84  |
| 389      | 1450      | 61.09039624 | 291.67   | 30       | 72888.333   | 0.85     | 1450      | 50.20146011 | 291.94 | 39     | 98189.93184 | 0.88  |
| 269      | 1550      | 30.14656867 | 45.7     | 24.4382  | 9204.654384 | 0.841    | 1550      | 33.18051881 | 44.32  | 21.07  | 7312.016156 | 0.799 |
| 219      | 1550      | 40.81877308 | 50.2     | 17.3686  | 7262.957988 | 0.85     | 1550      | 47.48061657 | 46.08  | 13.41  | 4983.875205 | 0.823 |
| 185      | 1550      | 55.60690385 | 59.6     | 12.8954  | 5370.27695  | 0.713    | 1550      | 66.2165287  | 40.37  | 7.88   | 2497.143837 | 0.801 |
| 224      | 1050      | 65.32291705 | 94.9     | 8.44     | 5887.0266   | 0.75     | 1050      | 14.02558332 | 71.71  | 54.46  | 32186.92077 | 0.841 |

Table S1. Cont.

|          | TURBINE_  |             | TURBINE_ | TURBINE_ | TURBINE_    | TURBINE_ | PUMP_ROT_ |             | PUMP_  | PUMP_  | PUMP_       | PUMP_ |
|----------|-----------|-------------|----------|----------|-------------|----------|-----------|-------------|--------|--------|-------------|-------|
| DIAMETER | ROT_SPEED | TURBINE_NS  | FLOW     | HEAD     | POWER       | EFF      | SPEED     | PUMP_NS     | FLOW   | HEAD   | POWER       | EFF   |
| 200      | 1200      | 28.57760054 | 24.8     | 12.412   | 1803.934263 | 0.598    | 1400      | 30.5068308  | 22     | 12.9   | 1232.08932  | 0.443 |
| 225      | 1100      | 26.22613542 | 23.6     | 11.99    | 1979.955701 | 0.714    | 1400      | 26.97608768 | 20.5   | 14.5   | 1471.09025  | 0.505 |
| 250      | 1100      | 26.38342578 | 23.2     | 11.76    | 2050.769011 | 0.767    | 1400      | 25.51481412 | 23.9   | 17.3   | 2374.475516 | 0.586 |
| 255      | 1200      | 24.96361159 | 29.8     | 16.8     | 3532.51584  | 0.72     | 1450      | 28.00432108 | 25     | 16.5   | 2951.025    | 0.73  |
| 265      | 800       | 25.7453048  | 28.9     | 9.2      | 2058.44296  | 0.79     | 1450      | 27.16897033 | 35     | 21.5   | 5678.365    | 0.77  |
| 210      | 1200      | 18.21068193 | 16       | 16.9     | 1881.4432   | 0.71     | 1420      | 23.85624223 | 14     | 13.5   | 1315.062    | 0.71  |
| 419      | 1200      | 23.23566932 | 91.667   | 39.1     | 28451.21846 | 0.81     | 800       | 22.72512892 | 61.11  | 17.9   | 9058.329189 | 0.845 |
| 139      | 1200      | 13.30000937 | 5.1      | 11.99    | 320.604207  | 0.535    | 1450      | 27.04328659 | 3.889  | 5      | 129.390919  | 0.679 |
| 266      | 3000      | 35.97393179 | 32.1     | 36.8     | 8092.004256 | 0.699    | 3000      | 39.26531724 | 21.8   | 25.3   | 3486.28434  | 0.645 |
| 65       | 3000      | 21.77488403 | 17.1     | 47.23    | 5722.402858 | 0.723    | 2920      | 12.30982114 | 10.5   | 70.41  | 4883.257386 | 0.674 |
| 65       | 3000      | 30.05791767 | 17.9     | 31.68    | 3845.655475 | 0.692    | 2920      | 18.8472871  | 10.1   | 38.88  | 2605.327805 | 0.677 |
| 80       | 2700      | 48.89299246 | 36.1     | 22.97    | 5745.312906 | 0.707    | 2400      | 26.25657472 | 21.9   | 32.23  | 5084.143911 | 0.735 |
| 65       | 1250      | 13.80056182 | 9        | 17.6     | 982.61856   | 0.633    | 1450      | 21.57332183 | 7      | 10     | 514.5       | 0.75  |
| 139      | 1450      | 28.25106949 | 3.66     | 4.53     | 98.62659828 | 0.607    | 1020      | 17.4537596  | 4.053  | 5.765  | 153.1891861 | 0.669 |
| 174      | 1540      | 29.49111992 | 14.62    | 11.67    | 1225.598664 | 0.733    | 1450      | 30.61470522 | 11.944 | 8.954  | 842.6534616 | 0.804 |
| 185      | 1250      | 47.76777758 | 55.03    | 11.24    | 4473.508445 | 0.738    | 1450      | 60.52909567 | 40.075 | 8.087  | 2604.359315 | 0.82  |
| 224      | 1450      | 65.06050763 | 131.88   | 16.25    | 15730.41561 | 0.749    | 1450      | 80.00043188 | 104.34 | 10.552 | 9343.930137 | 0.866 |
| 334      | 1500      | 21.0637643  | 71.44    | 50.82    | 28641.65193 | 0.805    | 1450      | 22.86598766 | 51.03  | 34.79  | 14092.59891 | 0.81  |
| 219      | 1500      | 35.10465349 | 55.48    | 21.73    | 9203.64189  | 0.779    | 1450      | 42.41345128 | 42.11  | 13.43  | 4733.094771 | 0.854 |
| 320      | 1450      | 12.63406257 | 13.11    | 31.01    | 2087.669857 | 0.524    | 1450      | 12.43644776 | 13.31  | 31.99  | 2566.217646 | 0.615 |
| 141      | 1520      | 54.33244309 | 22.01    | 6.67     | 1116.435592 | 0.776    | 1450      | 55.19885307 | 16.74  | 5.11   | 694.1171362 | 0.828 |
| 174      | 1015      | 34.03149342 | 15.5     | 5.75     | 688.2589    | 0.788    | 1450      | 37.57609164 | 16.76  | 8.54   | 1164.222674 | 0.83  |
| 219      | 1525      | 23.17588995 | 22.72    | 21.31    | 3762.625892 | 0.793    | 1450      | 24.87887464 | 16.76  | 14.799 | 1942.134215 | 0.799 |
| 260      | 1520      | 17.42127373 | 23.49    | 31.74    | 5633.397451 | 0.771    | 1450      | 20.24001982 | 17.65  | 20.17  | 2648.002919 | 0.759 |
| 320      | 1520      | 13.61197851 | 29.2     | 50.99    | 9965.856807 | 0.683    | 1450      | 16.37175589 | 23.74  | 32.61  | 5606.631691 | 0.739 |
| 212      | 1520      | 28.71483707 | 37.81    | 22.39    | 6562.409544 | 0.791    | 2900      | 33.55019185 | 58.19  | 57.39  | 27261.87104 | 0.833 |
| 296      | 1520      | 21.15027388 | 37.34    | 33.38    | 9710.774077 | 0.795    | 1450      | 24.35106295 | 29.76  | 22.33  | 5236.049871 | 0.804 |

Table S1. *Cont.*

|          | TURBINE_  |             | TURBINE_ | TURBINE_ | TURBINE_    | TURBINE_ | PUMP_ROT_ |             | PUMP_  | PUMP_ | PUMP_       | PUMP_  |
|----------|-----------|-------------|----------|----------|-------------|----------|-----------|-------------|--------|-------|-------------|--------|
| DIAMETER | ROT_SPEED | TURBINE_NS  | FLOW     | HEAD     | POWER       | EFF      | SPEED     | PUMP_NS     | FLOW   | HEAD  | POWER       | EFF    |
| 334      | 1520      | 17.30919559 | 51.53    | 54.05    | 18751.61396 | 0.687    | 1450      | 19.16751263 | 37.87  | 36.08 | 10310.47408 | 0.77   |
| 404      | 1020      | 12.11953519 | 36.59    | 40.65    | 9474.632895 | 0.65     | 1450      | 16.59230498 | 44.46  | 48.67 | 15289.45993 | 0.721  |
| 219      | 1510      | 36.58112976 | 56.56    | 21.02    | 8971.372995 | 0.77     | 1450      | 42.41848701 | 42.12  | 13.43 | 4734.218755 | 0.854  |
| 334      | 1515      | 19.82524865 | 75.23    | 57.79    | 31741.40195 | 0.745    | 1450      | 24.80269532 | 59.73  | 34.67 | 16438.32078 | 0.81   |
| 404      | 1520      | 15.95631293 | 69.61    | 73.62    | 37566.01438 | 0.748    | 1450      | 17.34303079 | 51.66  | 50.71 | 19228.96486 | 0.749  |
| 419      | 1525      | 19.51289395 | 112.35   | 77.8     | 69042.068   | 0.806    | 1450      | 20.98221891 | 88.48  | 56.31 | 39549.56725 | 0.81   |
| 269      | 1520      | 54.19021238 | 164.15   | 25.55    | 33251.12847 | 0.809    | 1450      | 62.24213087 | 140.95 | 18.02 | 21929.15266 | 0.881  |
| 205      | 1550      | 21.78015256 | 28.18    | 27.31    | 3838.89777  | 0.509    | 2900      | 25.95611455 | 32.89  | 55.24 | 15597.23894 | 0.876  |
| 260      | 3050      | 11.51010927 | 16.14    | 108.7    | 6533.452632 | 0.38     | 2900      | 13.04240778 | 14.1   | 78.62 | 6931.048001 | 0.638  |
| 189      | 2910      | 32.31885775 | 49.6     | 54.48    | 16153.79942 | 0.61     | 2900      | 31.2194311  | 33.33  | 43.57 | 13659.33936 | 0.9598 |
| 146      | 2910      | 24.28727414 | 30.61    | 57.8     | 12605.25555 | 0.727    | 2900      | 28.16217737 | 25.55  | 41.87 | 8282.225147 | 0.79   |

Table S2: Input data for characteristic curve models.

| MAC  |       | TURB | TURB    |            |            |            | $Q_t/Q_t$ | $H_t/H_{tBE}$ |                | PUMP | PUMP    |            |            |            | $Q_p/Q_{pB}$ | $H_p/H_{pB}$ | $E_p/E_{pBE}$ |
|------|-------|------|---------|------------|------------|------------|-----------|---------------|----------------|------|---------|------------|------------|------------|--------------|--------------|---------------|
| HINE | DIAM  | ROT  | SPEC    | $Q_{tBEP}$ | $H_{tBEP}$ | $E_{tBEP}$ | BEP       | P             | $E_t/E_{tBEP}$ | ROT  | SPEC    | $Q_{pBEP}$ | $H_{pBEP}$ | $E_{pBEP}$ | EP           | EP           | P             |
| M.1  | 0.139 | 1450 | 68.899  | 0.004      | 4.531      | 0.607      | 0.656     | 0.629         | 0.762          | 1020 | 17.452  | 0.004      | 5.765      | 0.669      | 0.000        | 1.196        | 0.000         |
| M.1  | 0.139 | 1450 | 68.899  | 0.004      | 4.531      | 0.607      | 0.766     | 0.728         | 0.892          | 1020 | 17.452  | 0.004      | 5.765      | 0.669      | 0.242        | 1.187        | 0.523         |
| M.1  | 0.139 | 1450 | 68.899  | 0.004      | 4.531      | 0.607      | 0.820     | 0.779         | 0.937          | 1020 | 17.452  | 0.004      | 5.765      | 0.669      | 0.336        | 1.174        | 0.673         |
| M.1  | 0.139 | 1450 | 68.899  | 0.004      | 4.531      | 0.607      | 0.875     | 0.828         | 0.981          | 1020 | 17.452  | 0.004      | 5.765      | 0.669      | 0.480        | 1.150        | 0.822         |
| M.1  | 0.139 | 1450 | 68.899  | 0.004      | 4.531      | 0.607      | 0.919     | 0.883         | 1.001          | 1020 | 17.452  | 0.004      | 5.765      | 0.669      | 0.616        | 1.123        | 0.927         |
| M.1  | 0.139 | 1450 | 68.899  | 0.004      | 4.531      | 0.607      | 1.039     | 1.062         | 0.993          | 1020 | 17.452  | 0.004      | 5.765      | 0.669      | 0.774        | 1.060        | 0.987         |
| M.1  | 0.139 | 1450 | 68.899  | 0.004      | 4.531      | 0.607      | 1.094     | 1.159         | 0.985          | 1020 | 17.452  | 0.004      | 5.765      | 0.669      | 0.927        | 0.985        | 1.002         |
| M.1  | 0.139 | 1450 | 68.899  | 0.004      | 4.531      | 0.607      | 1.148     | 1.254         | 0.965          | 1020 | 17.452  | 0.004      | 5.765      | 0.669      | 1.054        | 0.920        | 0.987         |
| M.3  | 0.185 | 1250 | 128.524 | 0.055      | 11.236     | 0.738      | 0.477     | 0.357         | 0.198          | 1450 | 60.529  | 0.040      | 8.087      | 0.820      | 0.000        | 1.276        | 0.000         |
| M.3  | 0.185 | 1250 | 128.524 | 0.055      | 11.236     | 0.738      | 0.598     | 0.453         | 0.664          | 1450 | 60.529  | 0.040      | 8.087      | 0.820      | 0.336        | 1.263        | 0.585         |
| M.3  | 0.185 | 1250 | 128.524 | 0.055      | 11.236     | 0.738      | 0.696     | 0.552         | 0.861          | 1450 | 60.529  | 0.040      | 8.087      | 0.820      | 0.504        | 1.236        | 0.780         |
| M.3  | 0.185 | 1250 | 128.524 | 0.055      | 11.236     | 0.738      | 0.760     | 0.633         | 0.923          | 1450 | 60.529  | 0.040      | 8.087      | 0.820      | 0.696        | 1.178        | 0.927         |
| M.3  | 0.185 | 1250 | 128.524 | 0.055      | 11.236     | 0.738      | 0.811     | 0.703         | 0.960          | 1450 | 60.529  | 0.040      | 8.087      | 0.820      | 0.879        | 1.086        | 0.988         |
| M.3  | 0.185 | 1250 | 128.524 | 0.055      | 11.236     | 0.738      | 0.909     | 0.854         | 0.992          | 1450 | 60.529  | 0.040      | 8.087      | 0.820      | 1.005        | 0.997        | 1.000         |
| M.3  | 0.185 | 1250 | 128.524 | 0.055      | 11.236     | 0.738      | 0.989     | 0.991         | 0.999          | 1450 | 60.529  | 0.040      | 8.087      | 0.820      | 1.135        | 0.897        | 0.988         |
| M.3  | 0.185 | 1250 | 128.524 | 0.055      | 11.236     | 0.738      | 1.118     | 1.214         | 0.982          | 1450 | 60.529  | 0.040      | 8.087      | 0.820      | 1.324        | 0.727        | 0.927         |
| M.3  | 0.185 | 1250 | 128.524 | 0.055      | 11.236     | 0.738      | 0.477     | 0.357         | 0.198          | 2900 | 121.059 | 0.040      | 8.087      | 0.820      | 0.000        | 1.258        | 0.000         |
| M.3  | 0.185 | 1250 | 128.524 | 0.055      | 11.236     | 0.738      | 0.598     | 0.453         | 0.664          | 2900 | 121.059 | 0.040      | 8.087      | 0.820      | 0.343        | 1.250        | 0.610         |
| M.3  | 0.185 | 1250 | 128.524 | 0.055      | 11.236     | 0.738      | 0.696     | 0.552         | 0.861          | 2900 | 121.059 | 0.040      | 8.087      | 0.820      | 0.443        | 1.226        | 0.732         |
| M.3  | 0.185 | 1250 | 128.524 | 0.055      | 11.236     | 0.738      | 0.760     | 0.633         | 0.923          | 2900 | 121.059 | 0.040      | 8.087      | 0.820      | 0.563        | 1.196        | 0.854         |
| M.3  | 0.185 | 1250 | 128.524 | 0.055      | 11.236     | 0.738      | 0.811     | 0.703         | 0.960          | 2900 | 121.059 | 0.040      | 8.087      | 0.820      | 0.688        | 1.154        | 0.939         |
| M.3  | 0.185 | 1250 | 128.524 | 0.055      | 11.236     | 0.738      | 0.909     | 0.854         | 0.992          | 2900 | 121.059 | 0.040      | 8.087      | 0.820      | 0.849        | 1.076        | 0.988         |
| M.3  | 0.185 | 1250 | 128.524 | 0.055      | 11.236     | 0.738      | 0.989     | 0.991         | 0.999          | 2900 | 121.059 | 0.040      | 8.087      | 0.820      | 0.971        | 0.992        | 1.000         |
| M.3  | 0.185 | 1250 | 128.524 | 0.055      | 11.236     | 0.738      | 1.118     | 1.214         | 0.982          | 2900 | 121.059 | 0.040      | 8.087      | 0.820      | 1.099        | 0.896        | 0.988         |
| M.4  | 0.224 | 1450 | 176.369 | 0.132      | 16.250     | 0.749      | 0.663     | 0.506         | 0.777          | 1450 | 79.999  | 0.104      | 10.552     | 0.866      | 0.000        | 1.377        | 0.000         |

Table S2. Cont.

| MAC | DIAM  | TURB<br>ROT | TURB<br>SPEC | $Q_t/Q_{tBEP}$ | $H_t/H_{tBEP}$ | $E_t/E_{tBEP}$ | $Q_t/Q_{tBEP}$ | $H_t/H_{tBE}$ | $E_t/E_{tBEP}$ | PUMP<br>ROT | PUMP<br>SPEC | $Q_p/Q_{pBEP}$ | $H_p/H_{pBEP}$ | $E_p/E_{pBEP}$ | $Q_p/Q_{pB}$ | $H_p/H_{pB}$ | $E_p/E_{pBE}$ |
|-----|-------|-------------|--------------|----------------|----------------|----------------|----------------|---------------|----------------|-------------|--------------|----------------|----------------|----------------|--------------|--------------|---------------|
|     |       | SPEED       | SPEED        |                |                |                |                |               |                | SPEED       | SPEED        |                |                |                | EP           | EP           | P             |
| M.4 | 0.224 | 1450        | 176.369      | 0.132          | 16.250         | 0.749          | 0.714          | 0.568         | 0.836          | 1450        | 79.999       | 0.104          | 10.552         | 0.866          | 0.416        | 1.336        | 0.693         |
| M.4 | 0.224 | 1450        | 176.369      | 0.132          | 16.250         | 0.749          | 0.765          | 0.635         | 0.905          | 1450        | 79.999       | 0.104          | 10.552         | 0.866          | 0.527        | 1.295        | 0.808         |
| M.4 | 0.224 | 1450        | 176.369      | 0.132          | 16.250         | 0.749          | 0.832          | 0.723         | 0.944          | 1450        | 79.999       | 0.104          | 10.552         | 0.866          | 0.686        | 1.224        | 0.924         |
| M.4 | 0.224 | 1450        | 176.369      | 0.132          | 16.250         | 0.749          | 0.896          | 0.820         | 0.981          | 1450        | 79.999       | 0.104          | 10.552         | 0.866          | 0.832        | 1.132        | 0.981         |
| M.4 | 0.224 | 1450        | 176.369      | 0.132          | 16.250         | 0.749          | 0.933          | 0.881         | 0.983          | 1450        | 79.999       | 0.104          | 10.552         | 0.866          | 0.991        | 1.008        | 0.999         |
| M.4 | 0.224 | 1450        | 176.369      | 0.132          | 16.250         | 0.749          | 0.988          | 0.982         | 1.000          | 1450        | 79.999       | 0.104          | 10.552         | 0.866          | 1.149        | 0.866        | 0.981         |
| M.4 | 0.224 | 1450        | 176.369      | 0.132          | 16.250         | 0.749          | 1.010          | 1.021         | 1.000          | 1450        | 79.999       | 0.104          | 10.552         | 0.866          | 1.289        | 0.706        | 0.924         |
| M.5 | 0.334 | 1500        | 59.213       | 0.071          | 50.817         | 0.805          | 0.563          | 0.647         | 0.728          | 1450        | 22.866       | 0.051          | 34.792         | 0.810          | 0.000        | 1.148        | 0.000         |
| M.5 | 0.334 | 1500        | 59.213       | 0.071          | 50.817         | 0.805          | 0.841          | 0.828         | 0.977          | 1450        | 22.866       | 0.051          | 34.792         | 0.810          | 0.387        | 1.141        | 0.741         |
| M.5 | 0.334 | 1500        | 59.213       | 0.071          | 50.817         | 0.805          | 0.928          | 0.910         | 0.996          | 1450        | 22.866       | 0.051          | 34.792         | 0.810          | 0.537        | 1.121        | 0.864         |
| M.5 | 0.334 | 1500        | 59.213       | 0.071          | 50.817         | 0.805          | 0.943          | 0.923         | 0.997          | 1450        | 22.866       | 0.051          | 34.792         | 0.810          | 0.707        | 1.094        | 0.951         |
| M.5 | 0.334 | 1500        | 59.213       | 0.071          | 50.817         | 0.805          | 0.956          | 0.944         | 1.001          | 1450        | 22.866       | 0.051          | 34.792         | 0.810          | 0.857        | 1.051        | 0.988         |
| M.5 | 0.334 | 1500        | 59.213       | 0.071          | 50.817         | 0.805          | 1.003          | 1.006         | 0.997          | 1450        | 22.866       | 0.051          | 34.792         | 0.810          | 1.021        | 0.992        | 1.000         |
| M.5 | 0.334 | 1500        | 59.213       | 0.071          | 50.817         | 0.805          | 1.094          | 1.130         | 0.989          | 1450        | 22.866       | 0.051          | 34.792         | 0.810          | 1.195        | 0.917        | 0.988         |
| M.6 | 0.219 | 1500        | 97.054       | 0.055          | 21.727         | 0.779          | 0.603          | 0.575         | 0.689          | 1450        | 42.408       | 0.042          | 13.434         | 0.854          | 0.000        | 1.194        | 0.000         |
| M.6 | 0.219 | 1500        | 97.054       | 0.055          | 21.727         | 0.779          | 0.786          | 0.712         | 0.940          | 1450        | 42.408       | 0.042          | 13.434         | 0.854          | 0.306        | 1.197        | 0.585         |
| M.6 | 0.219 | 1500        | 97.054       | 0.055          | 21.727         | 0.779          | 0.902          | 0.862         | 0.981          | 1450        | 42.408       | 0.042          | 13.434         | 0.854          | 0.462        | 1.187        | 0.761         |
| M.6 | 0.219 | 1500        | 97.054       | 0.055          | 21.727         | 0.779          | 0.978          | 0.972         | 1.000          | 1450        | 42.408       | 0.042          | 13.434         | 0.854          | 0.590        | 1.163        | 0.866         |
| M.6 | 0.219 | 1500        | 97.054       | 0.055          | 21.727         | 0.779          | 1.010          | 1.016         | 1.000          | 1450        | 42.408       | 0.042          | 13.434         | 0.854          | 0.716        | 1.131        | 0.936         |
| M.6 | 0.219 | 1500        | 97.054       | 0.055          | 21.727         | 0.779          | 1.037          | 1.046         | 1.002          | 1450        | 42.408       | 0.042          | 13.434         | 0.854          | 0.851        | 1.084        | 0.983         |
| M.6 | 0.219 | 1500        | 97.054       | 0.055          | 21.727         | 0.779          | 1.082          | 1.140         | 0.995          | 1450        | 42.408       | 0.042          | 13.434         | 0.854          | 0.991        | 1.016        | 1.001         |
| M.6 | 0.219 | 1500        | 97.054       | 0.055          | 21.727         | 0.779          | 1.265          | 1.459         | 0.956          | 1450        | 42.408       | 0.042          | 13.434         | 0.854          | 1.128        | 0.924        | 0.983         |
| M.6 | 0.219 | 1500        | 97.054       | 0.055          | 21.727         | 0.779          | 1.444          | 1.861         | 0.891          | 1450        | 42.408       | 0.042          | 13.434         | 0.854          | 1.256        | 0.821        | 0.936         |
| M.7 | 0.32  | 1450        | 28.648       | 0.013          | 31.006         | 0.524          | 0.469          | 0.459         | 0.466          | 1450        | 12.436       | 0.013          | 31.988         | 0.615          | 0.000        | 1.131        | 0.000         |
| M.7 | 0.32  | 1450        | 28.648       | 0.013          | 31.006         | 0.524          | 0.624          | 0.559         | 0.857          | 1450        | 12.436       | 0.013          | 31.988         | 0.615          | 0.412        | 1.107        | 0.732         |
| M.7 | 0.32  | 1450        | 28.648       | 0.013          | 31.006         | 0.524          | 0.781          | 0.710         | 0.974          | 1450        | 12.436       | 0.013          | 31.988         | 0.615          | 0.556        | 1.096        | 0.862         |



Table S2. Cont.

| MAC  | DIAM  | TURB  | TURB    | $Q_t/Q_t$  | $H_t/H_{tBE}$ | $E_t/E_{tBEP}$ | $Q_t/Q_t$ | $H_t/H_{tBE}$ | $E_t/E_{tBEP}$ | PUMP  | PUMP    | $Q_p/Q_{pB}$ | $H_p/H_{pB}$ | $E_p/E_{pBE}$ | $Q_p/Q_{pB}$ | $H_p/H_{pB}$ | $E_p/E_{pBE}$ |
|------|-------|-------|---------|------------|---------------|----------------|-----------|---------------|----------------|-------|---------|--------------|--------------|---------------|--------------|--------------|---------------|
|      |       | ROT   | SPEC    |            |               |                |           |               |                | ROT   | SPEC    |              |              |               |              |              |               |
| HINE |       | SPEED | SPEED   | $Q_{tBEP}$ | $H_{tBEP}$    | $E_{tBEP}$     | BEP       | P             |                | SPEED | SPEED   | $Q_{pBEP}$   | $H_{pBEP}$   | $E_{pBEP}$    | EP           | EP           | P             |
| M.7  | 0.32  | 1450  | 28.648  | 0.013      | 31.006        | 0.524          | 0.938     | 0.915         | 1.000          | 1450  | 12.436  | 0.013        | 31.988       | 0.615         | 0.690        | 1.078        | 0.943         |
| M.7  | 0.32  | 1450  | 28.648  | 0.013      | 31.006        | 0.524          | 0.969     | 0.972         | 1.000          | 1450  | 12.436  | 0.013        | 31.988       | 0.615         | 0.820        | 1.055        | 0.984         |
| M.7  | 0.32  | 1450  | 28.648  | 0.013      | 31.006        | 0.524          | 0.990     | 0.991         | 0.995          | 1450  | 12.436  | 0.013        | 31.988       | 0.615         | 0.956        | 1.007        | 1.000         |
| M.7  | 0.32  | 1450  | 28.648  | 0.013      | 31.006        | 0.524          | 1.280     | 1.461         | 0.922          | 1450  | 12.436  | 0.013        | 31.988       | 0.615         | 1.078        | 0.945        | 0.984         |
| M.7  | 0.32  | 1450  | 28.648  | 0.013      | 31.006        | 0.524          | 1.457     | 1.814         | 0.848          | 1450  | 12.436  | 0.013        | 31.988       | 0.615         | 1.178        | 0.883        | 0.943         |
| M.8  | 0.141 | 1520  | 149.877 | 0.022      | 6.668         | 0.776          | 0.847     | 0.781         | 0.783          | 1450  | 55.244  | 0.017        | 5.109        | 0.828         | 0.000        | 1.204        | 0.000         |
| M.8  | 0.141 | 1520  | 149.877 | 0.022      | 6.668         | 0.776          | 0.917     | 0.875         | 0.869          | 1450  | 55.244  | 0.017        | 5.109        | 0.828         | 0.343        | 1.200        | 0.604         |
| M.8  | 0.141 | 1520  | 149.877 | 0.022      | 6.668         | 0.776          | 0.983     | 0.974         | 0.939          | 1450  | 55.244  | 0.017        | 5.109        | 0.828         | 0.517        | 1.203        | 0.785         |
| M.8  | 0.141 | 1520  | 149.877 | 0.022      | 6.668         | 0.776          | 1.094     | 1.167         | 0.998          | 1450  | 55.244  | 0.017        | 5.109        | 0.828         | 0.680        | 1.166        | 0.894         |
| M.8  | 0.141 | 1520  | 149.877 | 0.022      | 6.668         | 0.776          | 1.198     | 1.374         | 0.977          | 1450  | 55.244  | 0.017        | 5.109        | 0.828         | 0.837        | 1.116        | 0.966         |
| M.8  | 0.141 | 1520  | 149.877 | 0.022      | 6.668         | 0.776          | 1.308     | 1.617         | 0.934          | 1450  | 55.244  | 0.017        | 5.109        | 0.828         | 0.996        | 1.026        | 1.003         |
| M.8  | 0.141 | 1520  | 149.877 | 0.022      | 6.668         | 0.776          | 1.353     | 1.725         | 0.907          | 1450  | 55.244  | 0.017        | 5.109        | 0.828         | 1.153        | 0.893        | 0.966         |
| M.8  | 0.141 | 1520  | 149.877 | 0.022      | 6.668         | 0.776          | 0.847     | 0.781         | 0.783          | 2900  | 110.488 | 0.017        | 5.109        | 0.828         | 0.000        | 1.264        | 0.000         |
| M.8  | 0.141 | 1520  | 149.877 | 0.022      | 6.668         | 0.776          | 0.917     | 0.875         | 0.869          | 2900  | 110.488 | 0.017        | 5.109        | 0.828         | 0.364        | 1.256        | 0.675         |
| M.8  | 0.141 | 1520  | 149.877 | 0.022      | 6.668         | 0.776          | 0.983     | 0.974         | 0.939          | 2900  | 110.488 | 0.017        | 5.109        | 0.828         | 0.488        | 1.233        | 0.807         |
| M.8  | 0.141 | 1520  | 149.877 | 0.022      | 6.668         | 0.776          | 1.094     | 1.167         | 0.998          | 2900  | 110.488 | 0.017        | 5.109        | 0.828         | 0.622        | 1.206        | 0.904         |
| M.8  | 0.141 | 1520  | 149.877 | 0.022      | 6.668         | 0.776          | 1.198     | 1.374         | 0.977          | 2900  | 110.488 | 0.017        | 5.109        | 0.828         | 0.772        | 1.156        | 0.964         |
| M.8  | 0.141 | 1520  | 149.877 | 0.022      | 6.668         | 0.776          | 1.308     | 1.617         | 0.934          | 2900  | 110.488 | 0.017        | 5.109        | 0.828         | 0.999        | 1.008        | 1.000         |
| M.8  | 0.141 | 1520  | 149.877 | 0.022      | 6.668         | 0.776          | 1.353     | 1.725         | 0.907          | 2900  | 110.488 | 0.017        | 5.109        | 0.828         | 1.195        | 0.834        | 0.964         |
| M.9  | 0.174 | 1015  | 94.661  | 0.016      | 5.748         | 0.788          | 0.743     | 0.687         | 0.845          | 1450  | 37.543  | 0.017        | 8.543        | 0.830         | 0.000        | 1.201        | 0.000         |
| M.9  | 0.174 | 1015  | 94.661  | 0.016      | 5.748         | 0.788          | 0.807     | 0.752         | 0.924          | 1450  | 37.543  | 0.017        | 8.543        | 0.830         | 0.306        | 1.192        | 0.602         |
| M.9  | 0.174 | 1015  | 94.661  | 0.016      | 5.748         | 0.788          | 0.869     | 0.822         | 0.967          | 1450  | 37.543  | 0.017        | 8.543        | 0.830         | 0.464        | 1.179        | 0.783         |
| M.9  | 0.174 | 1015  | 94.661  | 0.016      | 5.748         | 0.788          | 0.924     | 0.895         | 0.993          | 1450  | 37.543  | 0.017        | 8.543        | 0.830         | 0.628        | 1.147        | 0.903         |
| M.9  | 0.174 | 1015  | 94.661  | 0.016      | 5.748         | 0.788          | 0.985     | 0.978         | 0.999          | 1450  | 37.543  | 0.017        | 8.543        | 0.830         | 0.803        | 1.099        | 0.975         |
| M.9  | 0.174 | 1015  | 94.661  | 0.016      | 5.748         | 0.788          | 1.042     | 1.067         | 0.993          | 1450  | 37.543  | 0.017        | 8.543        | 0.830         | 0.995        | 1.010        | 1.000         |
| M.9  | 0.174 | 1015  | 94.661  | 0.016      | 5.748         | 0.788          | 1.111     | 1.180         | 0.983          | 1450  | 37.543  | 0.017        | 8.543        | 0.830         | 1.178        | 0.891        | 0.975         |

Table S2. Cont.

| MAC  |       | TURB<br>ROT | TURB<br>SPEC |            |            |            |                |               |                | PUMP<br>ROT | PUMP<br>SPEC |            |            |            |              |              |               |
|------|-------|-------------|--------------|------------|------------|------------|----------------|---------------|----------------|-------------|--------------|------------|------------|------------|--------------|--------------|---------------|
| HINE | DIAM  | SPEED       | SPEED        | $Q_{tBEP}$ | $H_{tBEP}$ | $E_{tBEP}$ | $Q_t/Q_{tBEP}$ | $H_t/H_{tBE}$ | $E_t/E_{tBEP}$ | SPEED       | SPEED        | $Q_{pBEP}$ | $H_{pBEP}$ | $E_{pBEP}$ | $Q_p/Q_{pB}$ | $H_p/H_{pB}$ | $E_p/E_{pBE}$ |
|      |       |             |              |            |            |            |                | P             |                |             |              |            |            |            | EP           | EP           | P             |
| M.9  | 0.174 | 1015        | 94.661       | 0.016      | 5.748      | 0.788      | 1.179          | 1.302         | 0.961          | 1450        | 37.543       | 0.017      | 8.543      | 0.830      | 1.345        | 0.741        | 0.903         |
| M.9  | 0.174 | 1015        | 94.661       | 0.016      | 5.748      | 0.788      | 0.743          | 0.687         | 0.845          | 2900        | 75.086       | 0.017      | 8.543      | 0.830      | 0.000        | 1.184        | 0.000         |
| M.9  | 0.174 | 1015        | 94.661       | 0.016      | 5.748      | 0.788      | 0.807          | 0.752         | 0.924          | 2900        | 75.086       | 0.017      | 8.543      | 0.830      | 0.306        | 1.183        | 0.661         |
| M.9  | 0.174 | 1015        | 94.661       | 0.016      | 5.748      | 0.788      | 0.869          | 0.822         | 0.967          | 2900        | 75.086       | 0.017      | 8.543      | 0.830      | 0.434        | 1.170        | 0.806         |
| M.9  | 0.174 | 1015        | 94.661       | 0.016      | 5.748      | 0.788      | 0.924          | 0.895         | 0.993          | 2900        | 75.086       | 0.017      | 8.543      | 0.830      | 0.557        | 1.152        | 0.902         |
| M.9  | 0.174 | 1015        | 94.661       | 0.016      | 5.748      | 0.788      | 0.985          | 0.978         | 0.999          | 2900        | 75.086       | 0.017      | 8.543      | 0.830      | 0.682        | 1.119        | 0.962         |
| M.9  | 0.174 | 1015        | 94.661       | 0.016      | 5.748      | 0.788      | 1.042          | 1.067         | 0.993          | 2900        | 75.086       | 0.017      | 8.543      | 0.830      | 0.846        | 1.059        | 0.992         |
| M.9  | 0.174 | 1015        | 94.661       | 0.016      | 5.748      | 0.788      | 1.111          | 1.180         | 0.983          | 2900        | 75.086       | 0.017      | 8.543      | 0.830      | 0.994        | 0.989        | 0.998         |
| M.9  | 0.174 | 1015        | 94.661       | 0.016      | 5.748      | 0.788      | 1.179          | 1.302         | 0.961          | 2900        | 75.086       | 0.017      | 8.543      | 0.830      | 1.129        | 0.911        | 0.992         |
| M.10 | 0.219 | 1525        | 64.641       | 0.023      | 21.306     | 0.793      | 0.734          | 0.756         | 0.760          | 1450        | 24.882       | 0.017      | 14.799     | 0.799      | 0.309        | 1.132        | 0.626         |
| M.10 | 0.219 | 1525        | 64.641       | 0.023      | 21.306     | 0.793      | 0.855          | 0.873         | 0.898          | 1450        | 24.882       | 0.017      | 14.799     | 0.799      | 0.464        | 1.121        | 0.801         |
| M.10 | 0.219 | 1525        | 64.641       | 0.023      | 21.306     | 0.793      | 0.977          | 1.020         | 0.987          | 1450        | 24.882       | 0.017      | 14.799     | 0.799      | 0.627        | 1.103        | 0.914         |
| M.10 | 0.219 | 1525        | 64.641       | 0.023      | 21.306     | 0.793      | 1.100          | 1.193         | 0.997          | 1450        | 24.882       | 0.017      | 14.799     | 0.799      | 0.781        | 1.081        | 0.970         |
| M.10 | 0.219 | 1525        | 64.641       | 0.023      | 21.306     | 0.793      | 1.222          | 1.394         | 0.987          | 1450        | 24.882       | 0.017      | 14.799     | 0.799      | 1.001        | 1.006        | 1.001         |
| M.10 | 0.219 | 1525        | 64.641       | 0.023      | 21.306     | 0.793      | 1.332          | 1.597         | 0.952          | 1450        | 24.882       | 0.017      | 14.799     | 0.799      | 1.191        | 0.909        | 0.970         |
| M.10 | 0.219 | 1525        | 64.641       | 0.023      | 21.306     | 0.793      | 1.413          | 1.757         | 0.913          | 1450        | 24.882       | 0.017      | 14.799     | 0.799      | 1.333        | 0.808        | 0.914         |
| M.10 | 0.219 | 1525        | 64.641       | 0.023      | 21.306     | 0.793      | 0.734          | 0.756         | 0.760          | 2900        | 49.764       | 0.017      | 14.799     | 0.799      | 0.000        | 1.146        | 0.000         |
| M.10 | 0.219 | 1525        | 64.641       | 0.023      | 21.306     | 0.793      | 0.855          | 0.873         | 0.898          | 2900        | 49.764       | 0.017      | 14.799     | 0.799      | 0.284        | 1.141        | 0.625         |
| M.10 | 0.219 | 1525        | 64.641       | 0.023      | 21.306     | 0.793      | 0.977          | 1.020         | 0.987          | 2900        | 49.764       | 0.017      | 14.799     | 0.799      | 0.448        | 1.126        | 0.813         |
| M.10 | 0.219 | 1525        | 64.641       | 0.023      | 21.306     | 0.793      | 1.100          | 1.193         | 0.997          | 2900        | 49.764       | 0.017      | 14.799     | 0.799      | 0.614        | 1.101        | 0.925         |
| M.10 | 0.219 | 1525        | 64.641       | 0.023      | 21.306     | 0.793      | 1.222          | 1.394         | 0.987          | 2900        | 49.764       | 0.017      | 14.799     | 0.799      | 0.755        | 1.067        | 0.976         |
| M.10 | 0.219 | 1525        | 64.641       | 0.023      | 21.306     | 0.793      | 1.332          | 1.597         | 0.952          | 2900        | 49.764       | 0.017      | 14.799     | 0.799      | 0.921        | 1.001        | 1.001         |
| M.10 | 0.219 | 1525        | 64.641       | 0.023      | 21.306     | 0.793      | 1.413          | 1.757         | 0.913          | 2900        | 49.764       | 0.017      | 14.799     | 0.799      | 1.063        | 0.923        | 0.976         |
| M.11 | 0.26  | 1520        | 47.903       | 0.023      | 31.741     | 0.771      | 0.647          | 0.675         | 0.603          | 1450        | 20.238       | 0.018      | 20.169     | 0.759      | 0.410        | 1.135        | 0.764         |
| M.11 | 0.26  | 1520        | 47.903       | 0.023      | 31.741     | 0.771      | 0.769          | 0.756         | 0.831          | 1450        | 20.238       | 0.018      | 20.169     | 0.759      | 0.588        | 1.120        | 0.896         |
| M.11 | 0.26  | 1520        | 47.903       | 0.023      | 31.741     | 0.771      | 0.886          | 0.869         | 0.950          | 1450        | 20.238       | 0.018      | 20.169     | 0.759      | 0.751        | 1.097        | 0.962         |

Table S2. Cont.

| MAC  |       | TURB<br>ROT | TURB<br>SPEC |            |            |            | $Q_t/Q_t$ | $H_t/H_{tBE}$ |                | PUMP<br>ROT | PUMP<br>SPEC |            |            |            | $Q_p/Q_{pB}$ | $H_p/H_{pB}$ | $E_p/E_{pBE}$ |
|------|-------|-------------|--------------|------------|------------|------------|-----------|---------------|----------------|-------------|--------------|------------|------------|------------|--------------|--------------|---------------|
| HINE | DIAM  | SPEED       | SPEED        | $Q_{tBEP}$ | $H_{tBEP}$ | $E_{tBEP}$ | BEP       | P             | $E_t/E_{tBEP}$ | SPEED       | SPEED        | $Q_{pBEP}$ | $H_{pBEP}$ | $E_{pBEP}$ | EP           | EP           | P             |
| M.11 | 0.26  | 1520        | 47.903       | 0.023      | 31.741     | 0.771      | 1.004     | 1.004         | 0.999          | 1450        | 20.238       | 0.018      | 20.169     | 0.759      | 0.968        | 1.026        | 1.002         |
| M.11 | 0.26  | 1520        | 47.903       | 0.023      | 31.741     | 0.771      | 1.123     | 1.170         | 0.988          | 1450        | 20.238       | 0.018      | 20.169     | 0.759      | 1.184        | 0.904        | 0.962         |
| M.11 | 0.26  | 1520        | 47.903       | 0.023      | 31.741     | 0.771      | 1.241     | 1.355         | 0.950          | 1450        | 20.238       | 0.018      | 20.169     | 0.759      | 1.302        | 0.806        | 0.896         |
| M.11 | 0.26  | 1520        | 47.903       | 0.023      | 31.741     | 0.771      | 0.647     | 0.675         | 0.603          | 2900        | 40.476       | 0.018      | 20.169     | 0.759      | 0.000        | 1.132        | 0.000         |
| M.11 | 0.26  | 1520        | 47.903       | 0.023      | 31.741     | 0.771      | 0.769     | 0.756         | 0.831          | 2900        | 40.476       | 0.018      | 20.169     | 0.759      | 0.389        | 1.122        | 0.723         |
| M.11 | 0.26  | 1520        | 47.903       | 0.023      | 31.741     | 0.771      | 0.886     | 0.869         | 0.950          | 2900        | 40.476       | 0.018      | 20.169     | 0.759      | 0.608        | 1.103        | 0.894         |
| M.11 | 0.26  | 1520        | 47.903       | 0.023      | 31.741     | 0.771      | 1.004     | 1.004         | 0.999          | 2900        | 40.476       | 0.018      | 20.169     | 0.759      | 0.803        | 1.073        | 0.973         |
| M.11 | 0.26  | 1520        | 47.903       | 0.023      | 31.741     | 0.771      | 1.123     | 1.170         | 0.988          | 2900        | 40.476       | 0.018      | 20.169     | 0.759      | 1.025        | 1.003        | 1.000         |
| M.11 | 0.26  | 1520        | 47.903       | 0.023      | 31.741     | 0.771      | 1.241     | 1.355         | 0.950          | 2900        | 40.476       | 0.018      | 20.169     | 0.759      | 1.195        | 0.908        | 0.973         |
| M.12 | 0.32  | 1520        | 35.240       | 0.029      | 50.998     | 0.683      | 0.705     | 0.719         | 0.542          | 1450        | 16.373       | 0.024      | 32.610     | 0.739      | 0.000        | 1.134        | 0.000         |
| M.12 | 0.32  | 1520        | 35.240       | 0.029      | 50.998     | 0.683      | 0.832     | 0.819         | 0.733          | 1450        | 16.373       | 0.024      | 32.610     | 0.739      | 0.280        | 1.127        | 0.609         |
| M.12 | 0.32  | 1520        | 35.240       | 0.029      | 50.998     | 0.683      | 0.960     | 0.950         | 0.870          | 1450        | 16.373       | 0.024      | 32.610     | 0.739      | 0.453        | 1.125        | 0.798         |
| M.12 | 0.32  | 1520        | 35.240       | 0.029      | 50.998     | 0.683      | 1.047     | 1.063         | 0.979          | 1450        | 16.373       | 0.024      | 32.610     | 0.739      | 0.642        | 1.102        | 0.920         |
| M.12 | 0.32  | 1520        | 35.240       | 0.029      | 50.998     | 0.683      | 1.177     | 1.249         | 1.001          | 1450        | 16.373       | 0.024      | 32.610     | 0.739      | 0.818        | 1.063        | 0.981         |
| M.12 | 0.32  | 1520        | 35.240       | 0.029      | 50.998     | 0.683      | 1.251     | 1.362         | 0.979          | 1450        | 16.373       | 0.024      | 32.610     | 0.739      | 0.965        | 1.009        | 1.001         |
| M.12 | 0.32  | 1520        | 35.240       | 0.029      | 50.998     | 0.683      | 1.313     | 1.471         | 0.941          | 1450        | 16.373       | 0.024      | 32.610     | 0.739      | 1.108        | 0.940        | 0.981         |
| M.12 | 0.32  | 1520        | 35.240       | 0.029      | 50.998     | 0.683      | 1.361     | 1.557         | 0.908          | 1450        | 16.373       | 0.024      | 32.610     | 0.739      | 1.243        | 0.851        | 0.920         |
| M.13 | 0.212 | 1520        | 79.982       | 0.038      | 22.393     | 0.791      | 0.602     | 0.589         | 0.561          | 2900        | 33.548       | 0.058      | 57.394     | 0.833      | 0.000        | 1.154        | 0.000         |
| M.13 | 0.212 | 1520        | 79.982       | 0.038      | 22.393     | 0.791      | 0.737     | 0.693         | 0.767          | 2900        | 33.548       | 0.058      | 57.394     | 0.833      | 0.362        | 1.146        | 0.696         |
| M.13 | 0.212 | 1520        | 79.982       | 0.038      | 22.393     | 0.791      | 0.867     | 0.829         | 0.910          | 2900        | 33.548       | 0.058      | 57.394     | 0.833      | 0.513        | 1.130        | 0.840         |
| M.13 | 0.212 | 1520        | 79.982       | 0.038      | 22.393     | 0.791      | 1.008     | 1.013         | 0.984          | 2900        | 33.548       | 0.058      | 57.394     | 0.833      | 0.667        | 1.102        | 0.936         |
| M.13 | 0.212 | 1520        | 79.982       | 0.038      | 22.393     | 0.791      | 1.117     | 1.178         | 1.000          | 2900        | 33.548       | 0.058      | 57.394     | 0.833      | 0.818        | 1.058        | 0.985         |
| M.13 | 0.212 | 1520        | 79.982       | 0.038      | 22.393     | 0.791      | 1.224     | 1.376         | 0.979          | 2900        | 33.548       | 0.058      | 57.394     | 0.833      | 0.954        | 1.001        | 1.003         |
| M.13 | 0.212 | 1520        | 79.982       | 0.038      | 22.393     | 0.791      | 1.300     | 1.531         | 0.942          | 2900        | 33.548       | 0.058      | 57.394     | 0.833      | 1.067        | 0.931        | 0.985         |
| M.13 | 0.212 | 1520        | 79.982       | 0.038      | 22.393     | 0.791      | 1.346     | 1.630         | 0.879          | 2900        | 33.548       | 0.058      | 57.394     | 0.833      | 1.201        | 0.840        | 0.936         |
| M.14 | 0.296 | 1520        | 59.080       | 0.037      | 33.379     | 0.795      | 0.825     | 0.802         | 0.763          | 1450        | 24.354       | 0.030      | 22.328     | 0.804      | 0.000        | 1.142        | 0.000         |

Table S2. Cont.

| MAC  |       | TURB<br>ROT | TURB<br>SPEC |            |            |            |                |                |                | PUMP<br>ROT | PUMP<br>SPEC |            |            |            |                |                |                |
|------|-------|-------------|--------------|------------|------------|------------|----------------|----------------|----------------|-------------|--------------|------------|------------|------------|----------------|----------------|----------------|
| HINE | DIAM  | SPEED       | SPEED        | $Q_{tBEP}$ | $H_{tBEP}$ | $E_{tBEP}$ | $Q_t/Q_{tBEP}$ | $H_t/H_{tBEP}$ | $E_t/E_{tBEP}$ | SPEED       | SPEED        | $Q_{pBEP}$ | $H_{pBEP}$ | $E_{pBEP}$ | $Q_p/Q_{pBEP}$ | $H_p/H_{pBEP}$ | $E_p/E_{pBEP}$ |
|      |       |             |              |            |            |            |                | P              |                |             |              |            |            |            | EP             | EP             | P              |
| M.14 | 0.296 | 1520        | 59.080       | 0.037      | 33.379     | 0.795      | 0.957          | 0.949          | 0.879          | 1450        | 24.354       | 0.030      | 22.328     | 0.804      | 0.382          | 1.134          | 0.747          |
| M.14 | 0.296 | 1520        | 59.080       | 0.037      | 33.379     | 0.795      | 1.042          | 1.055          | 0.932          | 1450        | 24.354       | 0.030      | 22.328     | 0.804      | 0.503          | 1.121          | 0.858          |
| M.14 | 0.296 | 1520        | 59.080       | 0.037      | 33.379     | 0.795      | 1.102          | 1.143          | 0.974          | 1450        | 24.354       | 0.030      | 22.328     | 0.804      | 0.633          | 1.102          | 0.933          |
| M.14 | 0.296 | 1520        | 59.080       | 0.037      | 33.379     | 0.795      | 1.187          | 1.277          | 1.000          | 1450        | 24.354       | 0.030      | 22.328     | 0.804      | 0.785          | 1.063          | 0.983          |
| M.14 | 0.296 | 1520        | 59.080       | 0.037      | 33.379     | 0.795      | 1.266          | 1.415          | 0.974          | 1450        | 24.354       | 0.030      | 22.328     | 0.804      | 0.926          | 1.012          | 1.002          |
| M.14 | 0.296 | 1520        | 59.080       | 0.037      | 33.379     | 0.795      | 1.319          | 1.512          | 0.947          | 1450        | 24.354       | 0.030      | 22.328     | 0.804      | 1.092          | 0.930          | 0.983          |
| M.14 | 0.296 | 1520        | 59.080       | 0.037      | 33.379     | 0.795      | 1.370          | 1.609          | 0.911          | 1450        | 24.354       | 0.030      | 22.328     | 0.804      | 1.237          | 0.835          | 0.933          |
| M.14 | 0.296 | 1520        | 59.080       | 0.037      | 33.379     | 0.795      | 0.825          | 0.802          | 0.763          | 2900        | 48.708       | 0.030      | 22.328     | 0.804      | 0.000          | 1.148          | 0.000          |
| M.14 | 0.296 | 1520        | 59.080       | 0.037      | 33.379     | 0.795      | 0.957          | 0.949          | 0.879          | 2900        | 48.708       | 0.030      | 22.328     | 0.804      | 0.281          | 1.147          | 0.621          |
| M.14 | 0.296 | 1520        | 59.080       | 0.037      | 33.379     | 0.795      | 1.042          | 1.055          | 0.932          | 2900        | 48.708       | 0.030      | 22.328     | 0.804      | 0.443          | 1.137          | 0.807          |
| M.14 | 0.296 | 1520        | 59.080       | 0.037      | 33.379     | 0.795      | 1.102          | 1.143          | 0.974          | 2900        | 48.708       | 0.030      | 22.328     | 0.804      | 0.636          | 1.111          | 0.931          |
| M.14 | 0.296 | 1520        | 59.080       | 0.037      | 33.379     | 0.795      | 1.187          | 1.277          | 1.000          | 2900        | 48.708       | 0.030      | 22.328     | 0.804      | 0.789          | 1.075          | 0.981          |
| M.14 | 0.296 | 1520        | 59.080       | 0.037      | 33.379     | 0.795      | 1.266          | 1.415          | 0.974          | 2900        | 48.708       | 0.030      | 22.328     | 0.804      | 0.972          | 1.010          | 1.000          |
| M.14 | 0.296 | 1520        | 59.080       | 0.037      | 33.379     | 0.795      | 1.319          | 1.512          | 0.947          | 2900        | 48.708       | 0.030      | 22.328     | 0.804      | 1.131          | 0.929          | 0.981          |
| M.14 | 0.296 | 1520        | 59.080       | 0.037      | 33.379     | 0.795      | 1.370          | 1.609          | 0.911          | 2900        | 48.708       | 0.030      | 22.328     | 0.804      | 1.254          | 0.847          | 0.931          |
| M.15 | 0.334 | 1520        | 44.943       | 0.052      | 54.051     | 0.687      | 0.793          | 0.778          | 0.796          | 1450        | 19.169       | 0.038      | 36.076     | 0.770      | 0.000          | 1.120          | 0.000          |
| M.15 | 0.334 | 1520        | 44.943       | 0.052      | 54.051     | 0.687      | 0.894          | 0.877          | 0.899          | 1450        | 19.169       | 0.038      | 36.076     | 0.770      | 0.287          | 1.119          | 0.649          |
| M.15 | 0.334 | 1520        | 44.943       | 0.052      | 54.051     | 0.687      | 0.977          | 0.975          | 0.964          | 1450        | 19.169       | 0.038      | 36.076     | 0.770      | 0.465          | 1.111          | 0.844          |
| M.15 | 0.334 | 1520        | 44.943       | 0.052      | 54.051     | 0.687      | 1.087          | 1.123          | 0.991          | 1450        | 19.169       | 0.038      | 36.076     | 0.770      | 0.677          | 1.078          | 0.961          |
| M.15 | 0.334 | 1520        | 44.943       | 0.052      | 54.051     | 0.687      | 1.174          | 1.257          | 1.002          | 1450        | 19.169       | 0.038      | 36.076     | 0.770      | 0.841          | 1.041          | 0.993          |
| M.15 | 0.334 | 1520        | 44.943       | 0.052      | 54.051     | 0.687      | 1.241          | 1.364          | 0.991          | 1450        | 19.169       | 0.038      | 36.076     | 0.770      | 0.957          | 1.007          | 1.000          |
| M.15 | 0.334 | 1520        | 44.943       | 0.052      | 54.051     | 0.687      | 1.279          | 1.436          | 0.958          | 1450        | 19.169       | 0.038      | 36.076     | 0.770      | 1.096          | 0.954          | 0.993          |
| M.15 | 0.334 | 1520        | 44.943       | 0.052      | 54.051     | 0.687      | 1.337          | 1.543          | 0.904          | 1450        | 19.169       | 0.038      | 36.076     | 0.770      | 1.276          | 0.866          | 0.961          |
| M.16 | 0.404 | 1020        | 30.612       | 0.037      | 40.653     | 0.650      | 0.892          | 0.881          | 0.877          | 1450        | 16.591       | 0.044      | 48.674     | 0.721      | 0.000          | 1.169          | 0.000          |
| M.16 | 0.404 | 1020        | 30.612       | 0.037      | 40.653     | 0.650      | 0.997          | 0.998          | 0.957          | 1450        | 16.591       | 0.044      | 48.674     | 0.721      | 0.226          | 1.165          | 0.555          |
| M.16 | 0.404 | 1020        | 30.612       | 0.037      | 40.653     | 0.650      | 1.100          | 1.127          | 0.991          | 1450        | 16.591       | 0.044      | 48.674     | 0.721      | 0.366          | 1.159          | 0.763          |

Table S2. Cont.

| MAC  |       | TURB<br>ROT | TURB<br>SPEC |                |                |                |           |               |                | PUMP<br>ROT | PUMP<br>SPEC |                |                |                |              |              |               |
|------|-------|-------------|--------------|----------------|----------------|----------------|-----------|---------------|----------------|-------------|--------------|----------------|----------------|----------------|--------------|--------------|---------------|
| HINE | DIAM  | SPEED       | SPEED        | $Q_t/Q_{tBEP}$ | $H_t/H_{tBEP}$ | $E_t/E_{tBEP}$ | $Q_t/Q_t$ | $H_t/H_{tBE}$ | $E_t/E_{tBEP}$ | SPEED       | SPEED        | $Q_p/Q_{pBEP}$ | $H_p/H_{pBEP}$ | $E_p/E_{pBEP}$ | $Q_p/Q_{pB}$ | $H_p/H_{pB}$ | $E_p/E_{pBE}$ |
|      |       |             |              | BEP            | BEP            | BEP            | BEP       | P             |                |             |              |                |                |                | EP           | EP           | P             |
| M.16 | 0.404 | 1020        | 30.612       | 0.037          | 40.653         | 0.650          | 1.189     | 1.256         | 1.008          | 1450        | 16.591       | 0.044          | 48.674         | 0.721          | 0.534        | 1.132        | 0.902         |
| M.16 | 0.404 | 1020        | 30.612       | 0.037          | 40.653         | 0.650          | 1.288     | 1.405         | 0.979          | 1450        | 16.591       | 0.044          | 48.674         | 0.721          | 0.696        | 1.091        | 0.971         |
| M.16 | 0.404 | 1020        | 30.612       | 0.037          | 40.653         | 0.650          | 1.377     | 1.549         | 0.961          | 1450        | 16.591       | 0.044          | 48.674         | 0.721          | 0.869        | 1.016        | 0.999         |
| M.16 | 0.404 | 1020        | 30.612       | 0.037          | 40.653         | 0.650          | 1.436     | 1.654         | 0.926          | 1450        | 16.591       | 0.044          | 48.674         | 0.721          | 1.042        | 0.913        | 0.971         |
| M.17 | 0.219 | 1510        | 100.562      | 0.057          | 21.021         | 0.770          | 0.652     | 0.640         | 0.478          | 1450        | 42.414       | 0.042          | 13.431         | 0.854          | 0.000        | 1.195        | 0.000         |
| M.17 | 0.219 | 1510        | 100.562      | 0.057          | 21.021         | 0.770          | 0.704     | 0.676         | 0.627          | 1450        | 42.414       | 0.042          | 13.431         | 0.854          | 0.306        | 1.197        | 0.585         |
| M.17 | 0.219 | 1510        | 100.562      | 0.057          | 21.021         | 0.770          | 0.782     | 0.739         | 0.796          | 1450        | 42.414       | 0.042          | 13.431         | 0.854          | 0.462        | 1.184        | 0.761         |
| M.17 | 0.219 | 1510        | 100.562      | 0.057          | 21.021         | 0.770          | 0.864     | 0.820         | 0.855          | 1450        | 42.414       | 0.042          | 13.431         | 0.854          | 0.590        | 1.163        | 0.866         |
| M.17 | 0.219 | 1510        | 100.562      | 0.057          | 21.021         | 0.770          | 0.955     | 0.942         | 0.956          | 1450        | 42.414       | 0.042          | 13.431         | 0.854          | 0.716        | 1.132        | 0.936         |
| M.17 | 0.219 | 1510        | 100.562      | 0.057          | 21.021         | 0.770          | 1.025     | 1.050         | 1.004          | 1450        | 42.414       | 0.042          | 13.431         | 0.854          | 0.851        | 1.084        | 0.983         |
| M.17 | 0.219 | 1510        | 100.562      | 0.057          | 21.021         | 0.770          | 1.124     | 1.231         | 0.998          | 1450        | 42.414       | 0.042          | 13.431         | 0.854          | 0.991        | 1.016        | 1.001         |
| M.17 | 0.219 | 1510        | 100.562      | 0.057          | 21.021         | 0.770          | 1.199     | 1.384         | 0.988          | 1450        | 42.414       | 0.042          | 13.431         | 0.854          | 1.128        | 0.924        | 0.983         |
| M.17 | 0.219 | 1510        | 100.562      | 0.057          | 21.021         | 0.770          | 1.260     | 1.515         | 0.972          | 1450        | 42.414       | 0.042          | 13.431         | 0.854          | 1.256        | 0.821        | 0.936         |
| M.18 | 0.334 | 1515        | 53.591       | 0.075          | 57.796         | 0.745          | 0.737     | 0.711         | 0.652          | 1450        | 24.802       | 0.060          | 34.672         | 0.810          | 0.000        | 1.156        | 0.000         |
| M.18 | 0.334 | 1515        | 53.591       | 0.075          | 57.796         | 0.745          | 0.815     | 0.782         | 0.781          | 1450        | 24.802       | 0.060          | 34.672         | 0.810          | 0.327        | 1.150        | 0.741         |
| M.18 | 0.334 | 1515        | 53.591       | 0.075          | 57.796         | 0.745          | 0.935     | 0.916         | 0.910          | 1450        | 24.802       | 0.060          | 34.672         | 0.810          | 0.453        | 1.131        | 0.864         |
| M.18 | 0.334 | 1515        | 53.591       | 0.075          | 57.796         | 0.745          | 1.035     | 1.052         | 0.958          | 1450        | 24.802       | 0.060          | 34.672         | 0.810          | 0.604        | 1.099        | 0.951         |
| M.18 | 0.334 | 1515        | 53.591       | 0.075          | 57.796         | 0.745          | 1.134     | 1.209         | 0.994          | 1450        | 24.802       | 0.060          | 34.672         | 0.810          | 0.732        | 1.057        | 0.988         |
| M.18 | 0.334 | 1515        | 53.591       | 0.075          | 57.796         | 0.745          | 1.214     | 1.351         | 0.985          | 1450        | 24.802       | 0.060          | 34.672         | 0.810          | 0.872        | 1.002        | 1.000         |
| M.18 | 0.334 | 1515        | 53.591       | 0.075          | 57.796         | 0.745          | 1.283     | 1.484         | 0.936          | 1450        | 24.802       | 0.060          | 34.672         | 0.810          | 1.018        | 0.928        | 0.988         |
| M.19 | 0.404 | 1520        | 43.237       | 0.070          | 73.621         | 0.748          | 0.679     | 0.721         | 0.683          | 1450        | 17.343       | 0.052          | 50.711         | 0.750          | 0.000        | 1.117        | 0.000         |
| M.19 | 0.404 | 1520        | 43.237       | 0.070          | 73.621         | 0.748          | 0.827     | 0.828         | 0.795          | 1450        | 17.343       | 0.052          | 50.711         | 0.750          | 0.266        | 1.123        | 0.600         |
| M.19 | 0.404 | 1520        | 43.237       | 0.070          | 73.621         | 0.748          | 0.956     | 0.954         | 0.946          | 1450        | 17.343       | 0.052          | 50.711         | 0.750          | 0.427        | 1.108        | 0.800         |
| M.19 | 0.404 | 1520        | 43.237       | 0.070          | 73.621         | 0.748          | 1.073     | 1.093         | 0.991          | 1450        | 17.343       | 0.052          | 50.711         | 0.750          | 0.615        | 1.085        | 0.933         |
| M.19 | 0.404 | 1520        | 43.237       | 0.070          | 73.621         | 0.748          | 1.173     | 1.231         | 1.013          | 1450        | 17.343       | 0.052          | 50.711         | 0.750          | 0.786        | 1.048        | 0.987         |
| M.19 | 0.404 | 1520        | 43.237       | 0.070          | 73.621         | 0.748          | 1.276     | 1.388         | 0.991          | 1450        | 17.343       | 0.052          | 50.711         | 0.750          | 0.963        | 0.995        | 1.000         |

Table S2. Cont.

| MAC  |       | TURB<br>ROT | TURB<br>SPEC |            |            |            |                |                |                | PUMP<br>ROT | PUMP<br>SPEC |            |            |            |                |                |                |
|------|-------|-------------|--------------|------------|------------|------------|----------------|----------------|----------------|-------------|--------------|------------|------------|------------|----------------|----------------|----------------|
| HINE | DIAM  | SPEED       | SPEED        | $Q_{tBEP}$ | $H_{tBEP}$ | $E_{tBEP}$ | $Q_t/Q_{tBEP}$ | $H_t/H_{tBEP}$ | $E_t/E_{tBEP}$ | SPEED       | SPEED        | $Q_{pBEP}$ | $H_{pBEP}$ | $E_{pBEP}$ | $Q_p/Q_{pBEP}$ | $H_p/H_{pBEP}$ | $E_p/E_{pBEP}$ |
| M.19 | 0.404 | 1520        | 43.237       | 0.070      | 73.621     | 0.748      | 1.359          | 1.531          | 0.946          | 1450        | 17.343       | 0.052      | 50.711     | 0.750      | 1.216          | 0.893          | 0.987          |
| M.20 | 0.419 | 1525        | 54.856       | 0.112      | 77.799     | 0.806      | 0.575          | 0.658          | 0.588          | 1450        | 20.982       | 0.088      | 56.310     | 0.810      | 0.000          | 1.119          | 0.000          |
| M.20 | 0.419 | 1525        | 54.856       | 0.112      | 77.799     | 0.806      | 0.746          | 0.775          | 0.806          | 1450        | 20.982       | 0.088      | 56.310     | 0.810      | 0.374          | 1.114          | 0.765          |
| M.20 | 0.419 | 1525        | 54.856       | 0.112      | 77.799     | 0.806      | 0.899          | 0.926          | 0.971          | 1450        | 20.982       | 0.088      | 56.310     | 0.810      | 0.540          | 1.096          | 0.888          |
| M.20 | 0.419 | 1525        | 54.856       | 0.112      | 77.799     | 0.806      | 1.034          | 1.097          | 0.996          | 1450        | 20.982       | 0.088      | 56.310     | 0.810      | 0.658          | 1.076          | 0.950          |
| M.20 | 0.419 | 1525        | 54.856       | 0.112      | 77.799     | 0.806      | 1.180          | 1.318          | 0.996          | 1450        | 20.982       | 0.088      | 56.310     | 0.810      | 0.790          | 1.043          | 0.987          |
| M.20 | 0.419 | 1525        | 54.856       | 0.112      | 77.799     | 0.806      | 1.325          | 1.573          | 0.962          | 1450        | 20.982       | 0.088      | 56.310     | 0.810      | 0.954          | 0.990          | 1.000          |
| M.20 | 0.419 | 1525        | 54.856       | 0.112      | 77.799     | 0.806      | 1.419          | 1.757          | 0.918          | 1450        | 20.982       | 0.088      | 56.310     | 0.810      | 1.133          | 0.919          | 0.987          |
| M.21 | 0.269 | 1520        | 152.717      | 0.164      | 25.546     | 0.809      | 0.812          | 0.738          | 0.878          | 1450        | 62.249       | 0.141      | 18.017     | 0.881      | 0.000          | 1.286          | 0.000          |
| M.21 | 0.269 | 1520        | 152.717      | 0.164      | 25.546     | 0.809      | 0.898          | 0.852          | 0.956          | 1450        | 62.249       | 0.141      | 18.017     | 0.881      | 0.335          | 1.256          | 0.681          |
| M.21 | 0.269 | 1520        | 152.717      | 0.164      | 25.546     | 0.809      | 0.967          | 0.951          | 0.987          | 1450        | 62.249       | 0.141      | 18.017     | 0.881      | 0.434          | 1.235          | 0.795          |
| M.21 | 0.269 | 1520        | 152.717      | 0.164      | 25.546     | 0.809      | 1.032          | 1.055          | 0.998          | 1450        | 62.249       | 0.141      | 18.017     | 0.881      | 0.580          | 1.178          | 0.909          |
| M.21 | 0.269 | 1520        | 152.717      | 0.164      | 25.546     | 0.809      | 1.123          | 1.216          | 0.992          | 1450        | 62.249       | 0.141      | 18.017     | 0.881      | 0.723          | 1.107          | 0.977          |
| M.21 | 0.269 | 1520        | 152.717      | 0.164      | 25.546     | 0.809      | 1.209          | 1.386          | 0.982          | 1450        | 62.249       | 0.141      | 18.017     | 0.881      | 0.861          | 1.008          | 0.999          |
| M.21 | 0.269 | 1520        | 152.717      | 0.164      | 25.546     | 0.809      | 1.289          | 1.557          | 0.956          | 1450        | 62.249       | 0.141      | 18.017     | 0.881      | 1.023          | 0.883          | 0.977          |
